# Supplementary material
Source: PubMed Central journal article supplement (PMC3807447)
Supplement: JB.00692-13_zjb999092842so1.pdf [file JB.00692-13_zjb999092842so1.pdf]

Table 1S. Genes or operons whose expression is increased or decreased at least 4-fold by growth on sialic acid.

| Gene or operon     | Function                                                                   | Gene          | Fold increase or decrease |
|--------------------|----------------------------------------------------------------------------|---------------|---------------------------|
| <i>tnaA</i>        | tryptophan utilization                                                     | <i>tnaA</i>   | -15.2                     |
| <i>rbsDACBKR</i>   | D-ribose-transport system                                                  | <i>rbsD</i>   | -13.1                     |
|                    |                                                                            | <i>rbsB</i>   | -4.6                      |
| <i>nrfABCDEFG</i>  | formate dependent nitrite reduction                                        | <i>nrfE</i>   | -10.4                     |
| <i>melR</i>        | mellibiose regulated activator of <i>melAB</i> transcription               | <i>melR</i>   | -7.6                      |
| <i>aldA</i>        | aldehyde dehydrogenase                                                     | <i>aldA</i>   | -7.4                      |
| <i>aceBAK</i>      | TCA cycle metabolism                                                       | <i>aceB</i>   | -7.1                      |
|                    | isocitrate utilization, glyoxylate bypass                                  | <i>aceK</i>   | -4.4                      |
| <i>mreBCD</i>      | shape determining factors                                                  | <i>mreC</i>   | -6.9                      |
| <i>ybfL</i>        | putative receptor protein                                                  | <i>ybfL</i>   | -6.4                      |
| <i>napFDAGHBC</i>  | iron/nitrate metabolism                                                    | <i>napG</i>   | -5.8                      |
| <i>gatYZABCD</i>   | galactitol metabolism                                                      | <i>gatC</i>   | -5.6                      |
| <i>ackA</i>        | acetate kinase                                                             | <i>ackA</i>   | -5.4                      |
| <i>tktAB</i>       | transketolase                                                              | <i>tktB</i>   | -5.4                      |
| <i>pstSCABphoU</i> | phosphate-specific transport                                               | <i>phoU</i>   | -5.3                      |
| <i>dmsABC</i>      | dimethylsulfoxide reductase                                                | <i>dmsB</i>   | -5.2                      |
| <i>cspD</i>        | stress induced DNA replication inhibition,<br>cold shock protein homologue | <i>cspD</i>   | -5.0                      |
| <i>cspE</i>        | cold shock protein                                                         | <i>cspE</i>   | -5.0                      |
| <i>fldB</i>        | Flavodoxin I                                                               | <i>fldB</i>   | -5.0                      |
| <i>insA_6</i>      | IS1 transposon related function                                            | <i>insA_6</i> | -4.9                      |
| <i>yagG</i>        | putative permease                                                          | <i>yagG</i>   | -4.9                      |
| <i>acs</i>         | Acetyl CoA synthetase biosynthesis                                         | <i>acs</i>    | -4.6                      |
| <i>yhiI</i>        | putative membrane protein                                                  | <i>yhiI</i>   | -4.6                      |
| <i>sdhCDAB</i>     | succinate-ubiquinone oxidoreductases                                       | <i>sdhD</i>   | -4.3                      |
| <i>fliAZY</i>      | chemotaxis                                                                 | <i>fliY</i>   | -4.2                      |
| <i>nuoA-N</i>      | NADH dehydrogenase                                                         | <i>nuoJ</i>   | -4.2                      |

|                           |                                                          |             |      |
|---------------------------|----------------------------------------------------------|-------------|------|
| <i>hofH</i>               | putative general protein secretion protein               | <i>hofH</i> | -4.1 |
| <i>malKlamBmalM</i>       | maltose and lambda receptor                              | <i>lamB</i> | -4.1 |
| <i>lplA</i>               | lipoate protein ligase                                   | <i>lplA</i> | -4.1 |
| <i>rpsJrplCDWrpsSrplV</i> | ribosomal subunit proteins                               | <i>rpsS</i> | 4.0  |
| <i>rpsFpriBrpsRI</i>      | ribosomal proteins                                       | <i>rpsF</i> | 4.0  |
| <i>zraP</i>               | Zn-binding periplasmic protein                           | <i>zraP</i> | 4.2  |
| <i>eutR</i>               | <i>eut</i> operon transcriptional activator, AraC family | <i>eutR</i> | 4.3  |
| <i>pdhRaceEFlpd</i>       | pyruvate dehydrogenase complex                           | <i>aceE</i> | 4.4  |
| <i>nrdI</i>               | putative zinc-resistance associated protein              | <i>nrdI</i> | 4.5  |
| <i>rpmUA</i>              | ribosomal proteins                                       | <i>rpmA</i> | 4.6  |
| <i>rluF</i>               | putative pseudouridine synthase                          | <i>rluF</i> | 4.8  |
| <i>surA</i>               | periplasmic molecular chaperone                          | <i>surA</i> | 5.3  |
| <i>yhbUVW</i>             | putative collagenases ( <i>yhbUV</i> )                   | <i>yhbU</i> | 5.8  |
| <i>yjiS</i>               | conserved protein                                        | <i>yjiS</i> | 5.8  |
| <i>csdE</i>               | CsdA-binding activator, Fe-S protein                     | <i>csdE</i> | 6.5  |
| <i>nanCMS</i>             | porin                                                    | <i>nanC</i> | 13.9 |
|                           | mutarotase                                               | <i>nanM</i> | 8.4  |
|                           | esterase                                                 | <i>nanS</i> | 4.6  |
| <i>nanATEKyhcH</i>        | sialic acid metabolism, unknown                          | <i>yhcH</i> | 10.5 |
| <i>yegS</i>               | phosphatidyl glycerol kinase, metal dependent            | <i>yegS</i> | 12.1 |
| <i>yjhBC</i>              | putative transport protein, dehydrogenase                | <i>yjhC</i> | 30.9 |

---

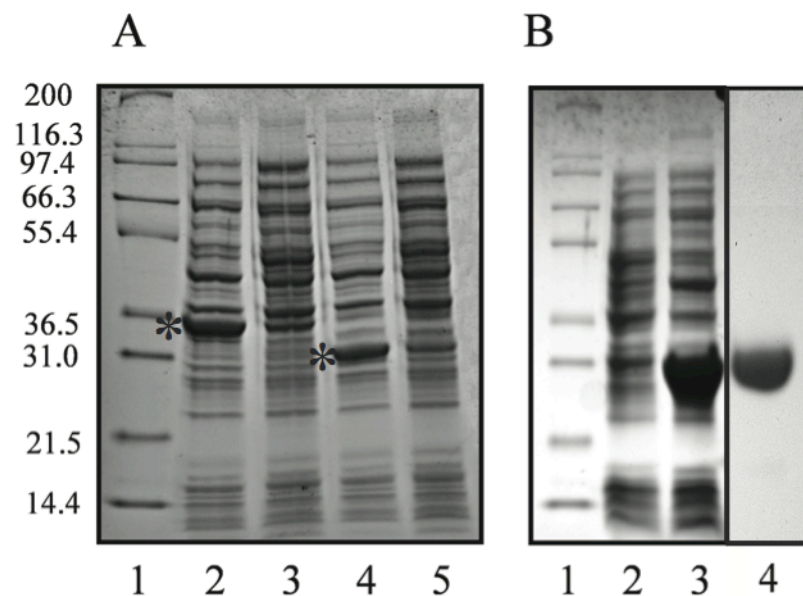

Figure S1

FIG. S1. Purification of native recombinant NanR. Strain BL21 (DE3) Star harboring either pSX674 expressing histidine-tagged *nanR* or pSX800 expressing the native form of the gene were either uninduced or induced with IPTG prior to cell disruption and SDS-PAGE of the soluble supernatant fractions. A. Lanes 2 and 3, induced and uninduced extracts from cells harboring pSX674 respectively. Lanes 4 and 5, induced and uninduced extracts from cell harboring pSX800. Asterisks indicate positions of the overproduced NanR polypeptides. Lane 1 shows molecular weight markers with sizes in kDa mass units given by the numbers at the left. B. Lanes 2 and 3 are uninduced and induced extracts respectively from cells harboring pSX800 as described in the text. Lane 4 shows 14  $\mu$ g of purified native NanR from the heparin chromatography step. The black vertical line indicates the result is from a separate gel included to show the purity of NanR after the heparin step. Lane 1 shows molecular weight markers.

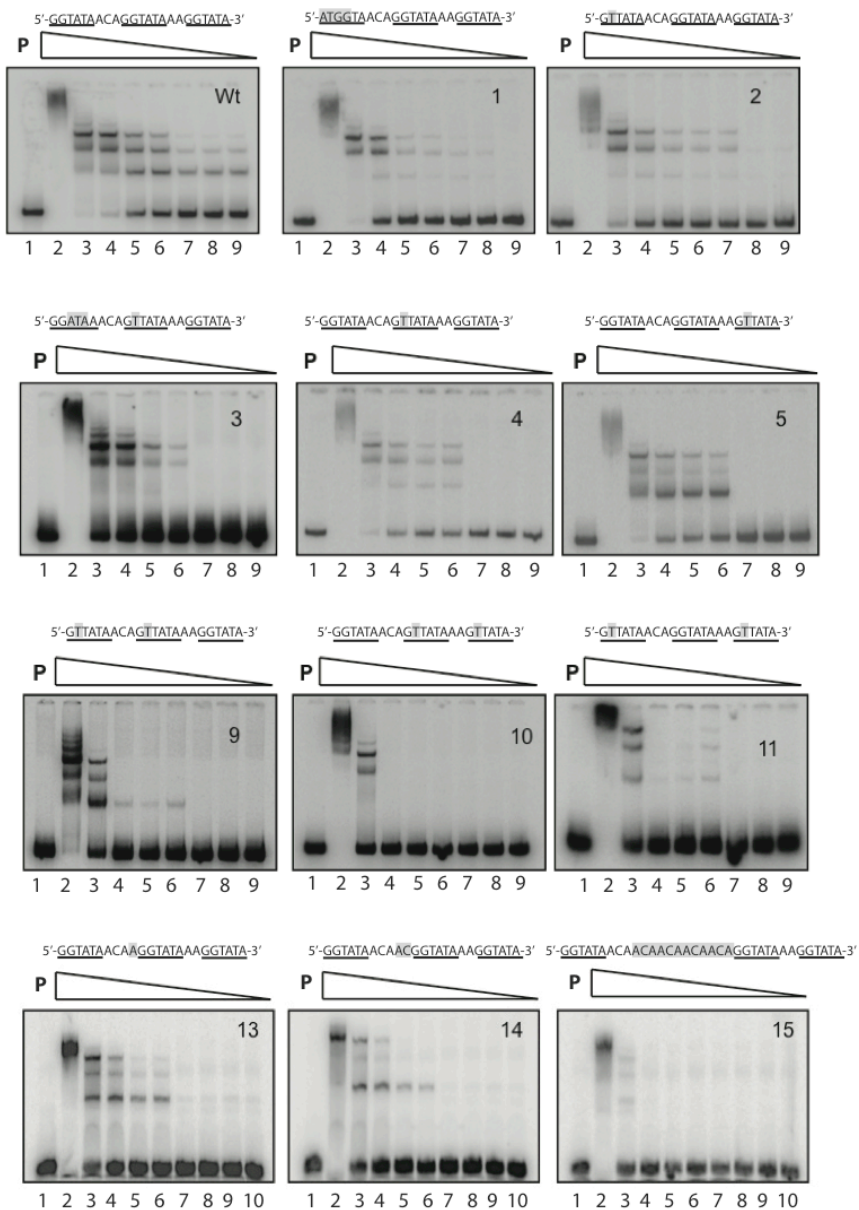

FIG. S2. Representative EMSA of NanR binding to wild type and mutant operators. The corresponding operator sequence and mutation if any (shaded in gray) is given above each EMSA gel and corresponds to the wild type (WT) or mutant numbers (in upper right corner) in Table 2. P means the promoter fragment alone (lane 1) and the triangles indicate decreasing NanR concentration. Lanes 2-9 for the wild type (WT) EMSA and mutant operators 1-5, 9-11, and 13-15 represent 550, 55, 28, 14, 7, 5.5, 3.7 and 2.75 mM NanR, respectively, used for the gel-shift analyses.

Figure S2
